# Supplementary material
Source: MDPI journal article supplement (https://www.mdpi.com/2071-1050/15/10/8254)
Supplement: s1 [file s1]

**Table S1.** Pearson correlation coefficients of soil properties (macro-nutrients) with 15 years average yield in maize-potato-onion high value based cropping system.

|    | Maize average<br>yield | Potato average<br>yield | Onion average<br>yield | OC    | N     | P     | K    |
|----|------------------------|-------------------------|------------------------|-------|-------|-------|------|
| OC | -0.011                 | 0.213                   | 0.091                  | 1.00  | -     | -     | -    |
| N  | 0.158                  | 0.409                   | 0.190                  | 0.714 | 1.00  | -     | -    |
| P  | -0.170                 | -0.096                  | -0.017                 | 0.361 | 0.785 | 1.00  | -    |
| K  | -0.275                 | 0.206                   | -0.281                 | 0.557 | 0.861 | 0.785 | 1.00 |

Note: OC- Organic carbon, N- Nitrogen, P-Phosphorus, K-Potassium.

**Table S2.** Pearson correlation coefficients of soil properties (micronutrients) with 15 years average yield in maize-potato-onion high value based cropping system.

|    | Maize average<br>yield | Potato average<br>yield | Onion average<br>yield | Zn     | Cu    | Fe    | Mn   |
|----|------------------------|-------------------------|------------------------|--------|-------|-------|------|
| Zn | 0.146                  | 0.233                   | 0.104                  | 1.00   | -     | -     | -    |
| Cu | 0.153                  | 0.734                   | -0.114                 | 0.421  | 1.00  | -     | -    |
| Fe | 0.337                  | 0.320                   | 0.235                  | 0.0004 | 0.442 |       | -    |
| Mn | 0.325                  | 0.470                   | 0.206                  | -0.006 | 0.723 | 0.770 | 1.00 |

Note: Zn- Zinc, Cu- Copper, Fe- Iron and Mn- Manganese.
